# Supplementary material
Source: PubMed Central journal article supplement (PMC4526310)
Supplement: NIHMS692083-supplement-supplement_1.pdf [file NIHMS692083-supplement-supplement_1.pdf]

## Supplementary Figures

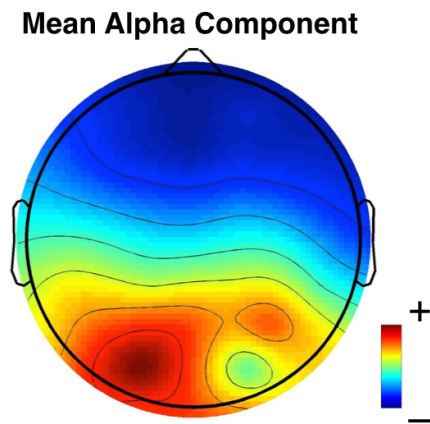

**Figure 1: Group Mean Alpha Component Topography Across 15 Subjects.** A typical posterior distribution is seen, without any visible contribution from BCG artifact, which would be evident from a bilateral weighting at temporal sites. Electrode site PO4 was given a zero weighting, likely due to a high impedance and low SNR at that site, but note that a zero weighting would result in no confounding effect.

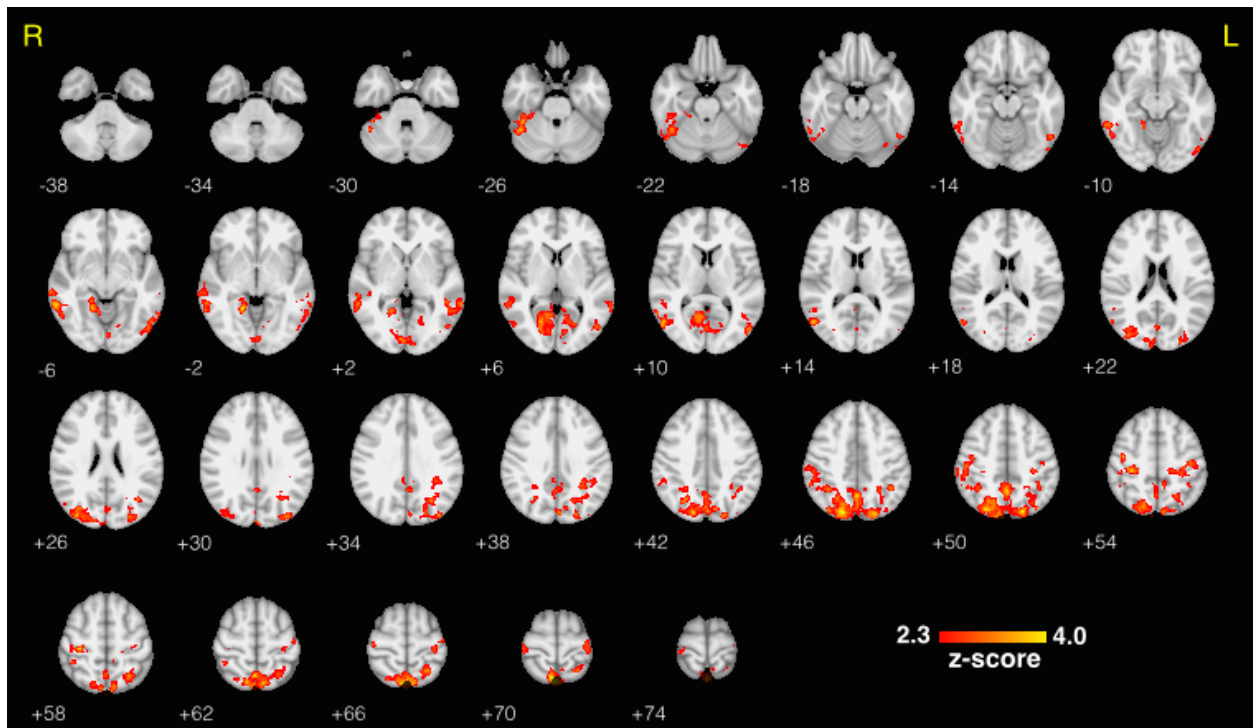

**Figure 2: Traditional fMRI Results - BOLD Correlates Target Trial Reaction Time Variability.** Group level (15 subjects) target vs. standard BOLD fMRI contrast, thresholded at  $z > 2.3$  and cluster corrected at  $p < 0.05$ . Statistical maps are displayed on an MNI template brain using radiological coordinates, and z-coordinate is displayed to the lower left of each axial slice.
